# Supplementary material for: Exploring the Potential of Montmorillonite as an Antiproliferative Nanoagent against MDA-MB-231 and MCF-7 Human Breast Cancer Cells
Source: MDPI journal article supplement (doi:10.3390/cells13020200), 2024-01-22
Supplement: s1 [file s1]

## Supplementary Information

**Table S1** Chemical composition of bentonite

| Formula                        | Wt.%  | Formula          | Wt.% |
|--------------------------------|-------|------------------|------|
| SiO <sub>2</sub>               | 61.03 | SO <sub>2</sub>  | 0.37 |
| Al <sub>2</sub> O <sub>3</sub> | 14.59 | Cl               | 0.46 |
| Fe <sub>2</sub> O <sub>3</sub> | 2.09  | K <sub>2</sub> O | 0.76 |
| CaO                            | 0.77  | TiO <sub>2</sub> | 0.22 |
| MgO                            | 2.22  | BaO              | 0.11 |
| Na <sub>2</sub> O              | 2.04  | Loss of ignition | 13.2 |

**Table S2** Primers used for qRT-PCR analysis

| Gene      | Primer sequences (5'-3')                                         |
|-----------|------------------------------------------------------------------|
| Akt       | F: TCTATGGCGCTGAGATTGTG<br>R: CTTAATGTGCCCGTCCTTGT               |
| PI3K      | F: CCTGATCTTCCTCGTGCTGCTC<br>R: ATGCCAATGGACAGTGTTCCTCTT         |
| mTOR      | F: CTGGGACTCAAATGTGTGCAGTTC<br>R: GAACAATAGGGTGAATGATCCGGG       |
| P21       | F: <i>TACCCTTGTGCCTCGCTCAG</i><br>R: <i>GAGAAGATCAGCCGGCGTTT</i> |
| P27       | F: AGCGACCTGCTGCAGAAGAT<br>R: TTACGTCTGGCGTCGAAGGC               |
| Cyclin D1 | F: TCCGGCGAGGGGCAGAAGAG<br>R: GCAGCACCCGGTCGTTGAGGA              |
| Cyclin B1 | F: AAAGGCGTAACTCGAATGGA<br>R: CCGACCTTTATTGAAGAGCA               |
| Bcl-2     | F: CTGCACCTGACGCCCTTCACC<br>R: CACATGACCCACCGAACTCAAAG           |
| Bcl-xL    | F: CCCAGAAAGGATACAGCTGG<br>R: GCGATCCGACTACCAATAC                |
| XIAP      | F: ATAGTGCCACGCAGTCTACAA<br>R: AGATGGCCTGTCTAAGGCAAA             |
| P53       | F: GAGGTTGGCTCTGACTGTACC<br>R: TCCGTCCAGTAGATTACCAC              |
| Cas-9     | F: ATGGACGAAGCGGATCGG<br>R: CCCTGGCCTTATGATGTT                   |
| Cas-8     | F: CATTTCATATTTAGCCGCCAAG<br>R: TTAAGAGTCCCAGGAATTCAGCAAC        |
| Cas-3     | F: GACTCTGGAATATCCCTGGACAACA<br>R: AGGTTTGCTGCATCGACATCTG        |
| Bad       | F: CCCAGAGTTTGAGCCGAGTG<br>R: CCCATCCCTTCGTCGTCCT                |
| Bax       | F: CCGGCGAATTGGAGATGAAC<br>R: CCCAGTTGAAGTTGCCATC                |
| P62       | F: AGGCGCACTACCGCGAT<br>R: CGTCACTGAAAAGGCAACC                   |
| HPRT1     | F: GCTATAAATTCTTTGCTGACCTGCTG<br>R: AATTACTTTTATGTCCCCTGTTGACTGG |

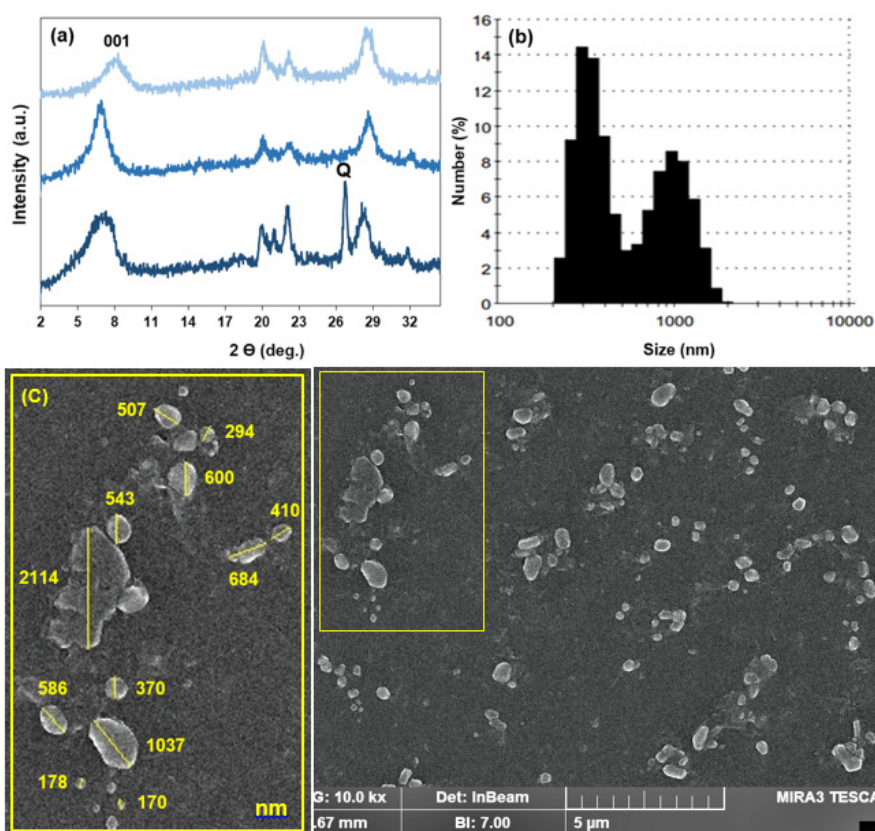

**Fig. S1** Properties of Mt. (a) XRD patterns of bentonite, extracted Mt and purified Mt, from bottom to top. The reflection of quartz (Q) disappeared in extracted Mt, indicating the high efficiency of the extraction method. The (001) reflection of Mt was weakened and shifted towards higher angle after purification, implying the partial exfoliation of Mt nanosheets and the removal of interlayer impurities; (b) Hydrodynamic size distribution based on dynamic light scattering (DLS) measurement; (c) FESEM image of separated Mt nanosheets. Although DLS data estimate the size of spherical particles, the size distribution determined by DLS is in accordance with the FESEM data

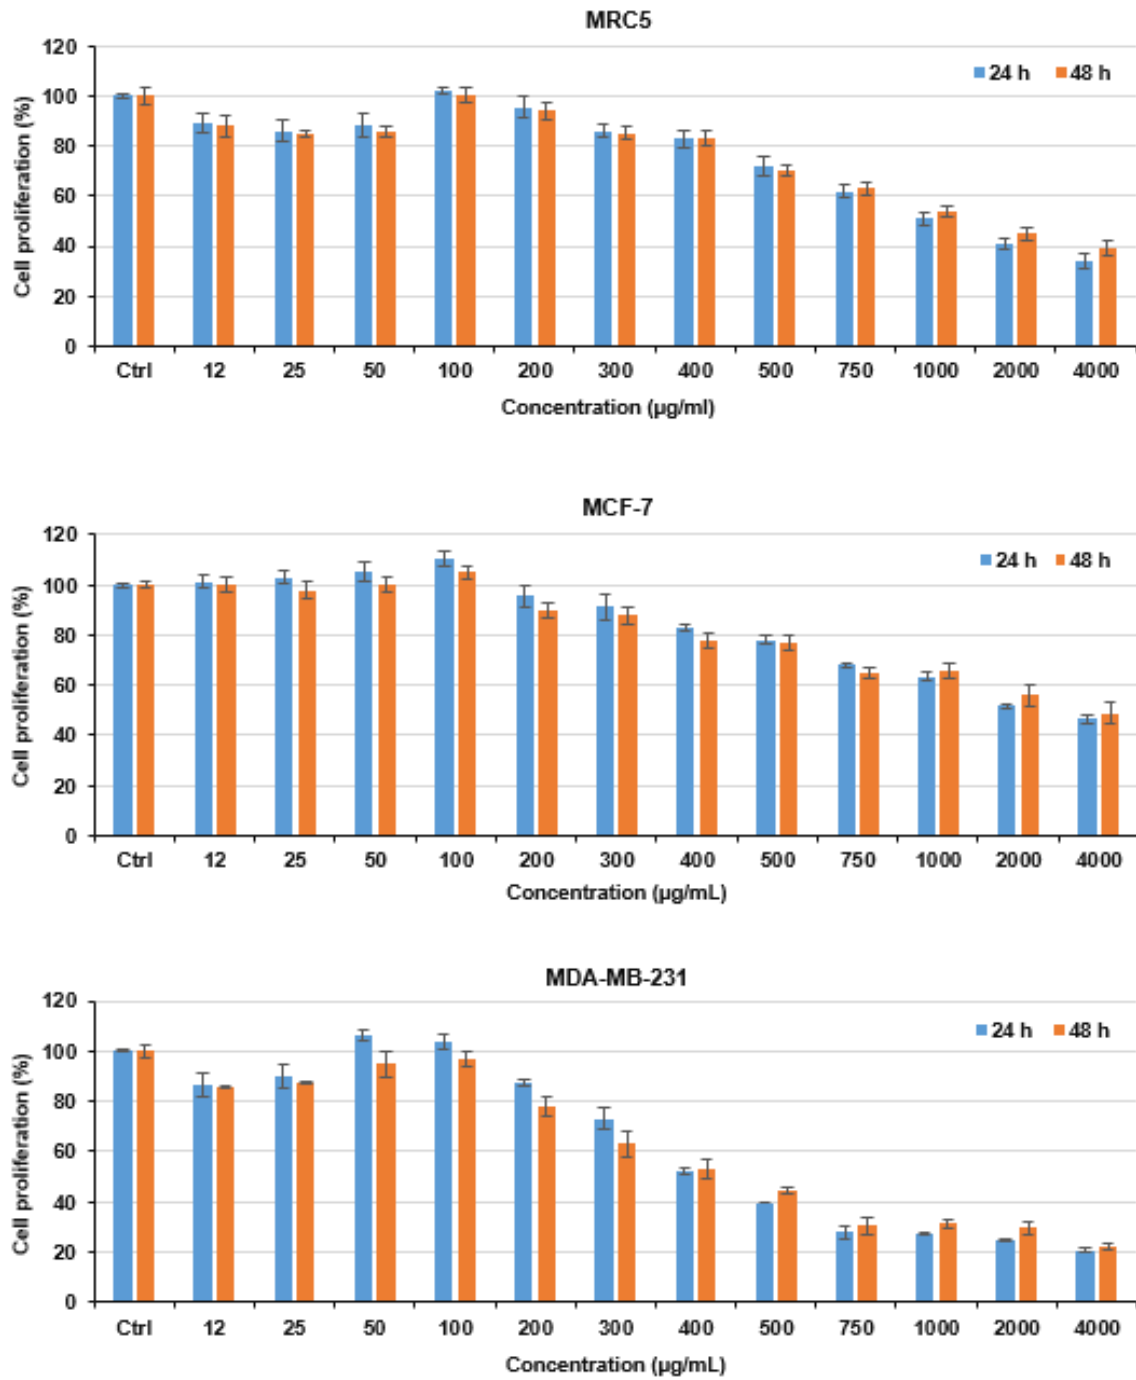

**Fig. S2** Antiproliferative effect of Mt on the cells in media containing 10% FBS after 24 and 48 h. Data were statistically analyzed by ANOVA methodology followed by Tukey post-hoc test and shown as mean  $\pm$  SD. No significant differences were observed between 24 and 48 h exposure times ( $p \leq 0.05$ ).
